# Supplementary material for: Diet shapes the gut microbiome of pigs during nursing and weaning
Source: PubMed Central journal article supplement (PMC4499176; doi:10.1186/s40168-015-0091-8), 2015-07-01

## Small Populations of *Prevotella* Shift Only at Weaning

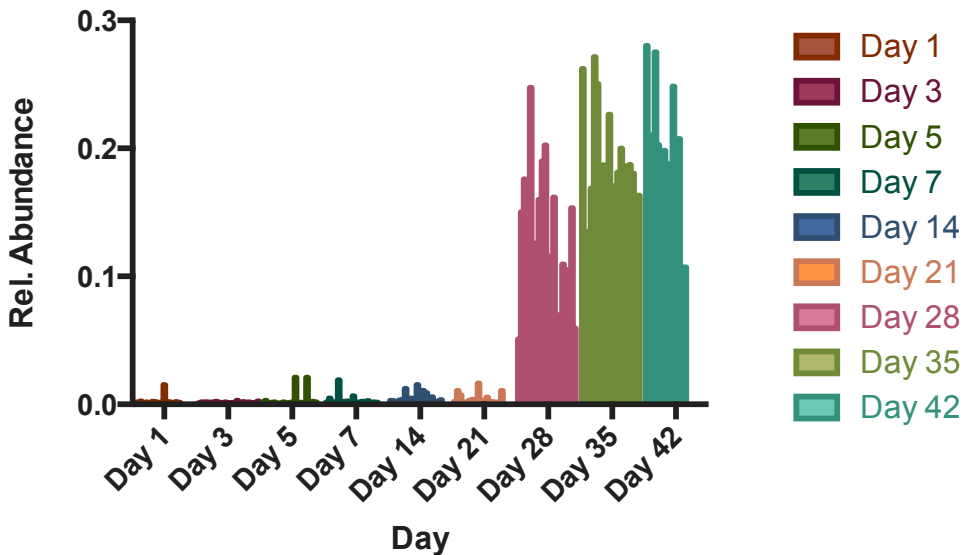

Supplement: 40168_2015_91_MOESM1_ESM.pdf [file 40168_2015_91_MOESM1_ESM.pdf]
