# Supplementary material for: Diet shapes the gut microbiome of pigs during nursing and weaning
Source: PubMed Central journal article supplement (PMC4499176; doi:10.1186/s40168-015-0091-8), 2015-07-01
Supplement: 40168_2015_91_MOESM2_ESM.pdf [file 40168_2015_91_MOESM2_ESM.pdf]

A

### Genes Associated with N-acetylglucosamine Catabolism

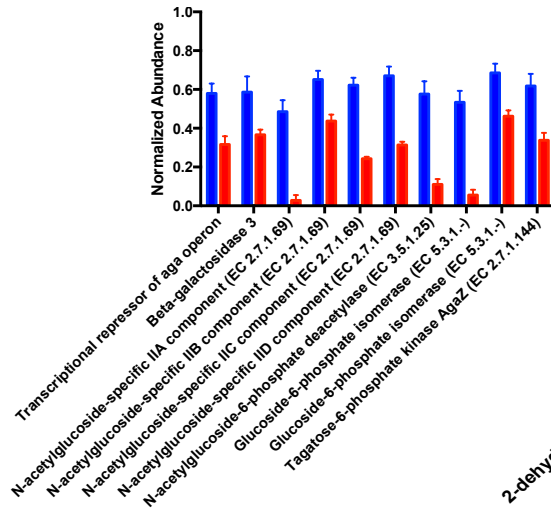

### Genes Associated with Galactonate Catabolism

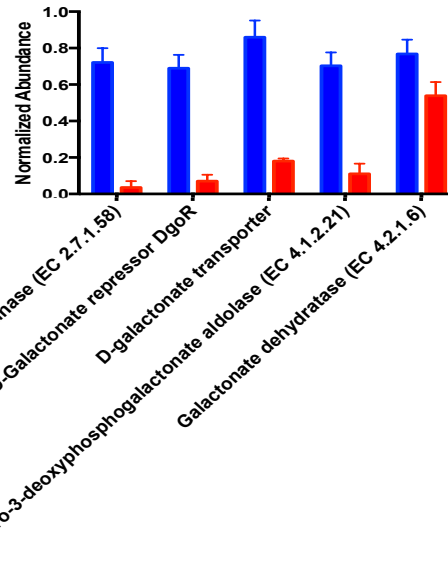

### Genes Associated with Sialic Acid Catabolism

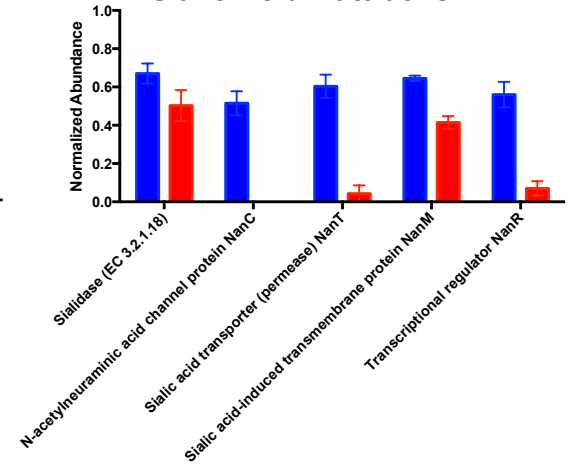

B

### Genes Associated with Xylose Catabolism

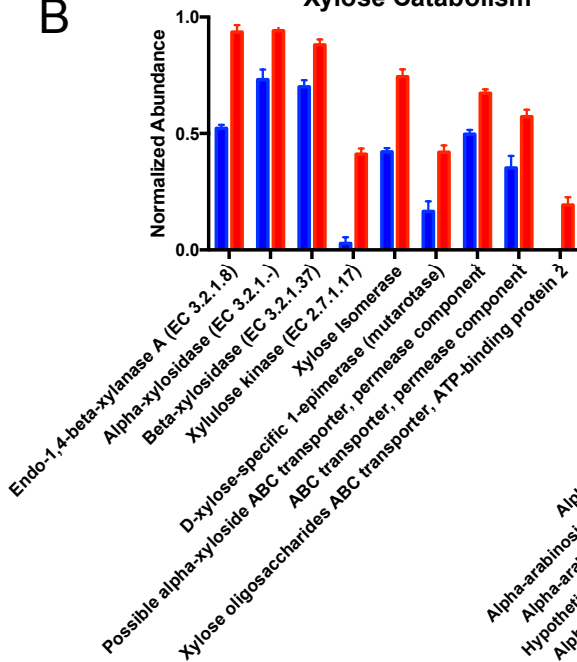

### Genes Associated with Arabinose Catabolism

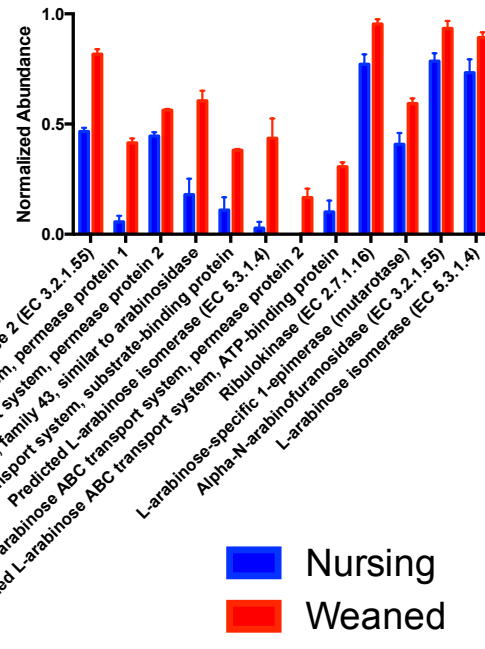

■ Nursing  
■ Weaned
